# Supplementary material for: Stability of molecular layer deposited zincone films: experimental and theoretical exploration
Source: Royal Society of Chemistry journal article supplement (doi:10.1039/c5ra02928g), 2015-01-01
Supplement: c5ra02928g1.pdf [file c5ra02928g1.pdf]

# Supporting Information

## **Stability of Molecular Layer Deposited Zincone films: Experimental and Theoretical exploration**

Devika Choudhury,<sup>a</sup> Gopalan Rajaraman<sup>b</sup>, Shaibal K. Sarkar<sup>a\*</sup>

<sup>a</sup>Department of Energy Science and Engineering, Indian Institute of Technology Bombay,  
Mumbai-400076, India.

<sup>b</sup>Department of Chemistry, Indian Institute of Technology Bombay, Mumbai-400076, India.

\* Email id: [shaibal.sarkar@iitb.ac.in](mailto:shaibal.sarkar@iitb.ac.in)

Tel: +9122 2576 7846;

Fax: +9122 2576 4890

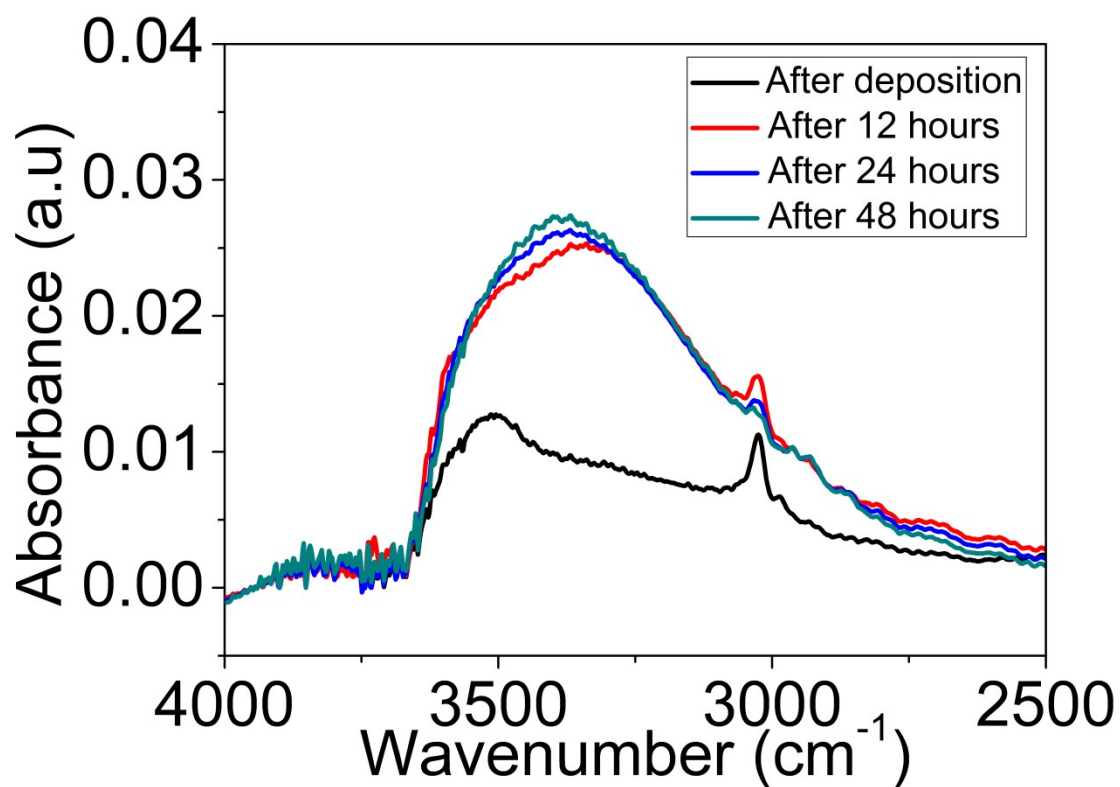

**Figure SI-1.** Increasing  $\text{-OH}$  vibration stretch observed in FTIR spectra of 300 cycles of Zincone film grown on KBr pallets and recorded over a time span of 48 hours.

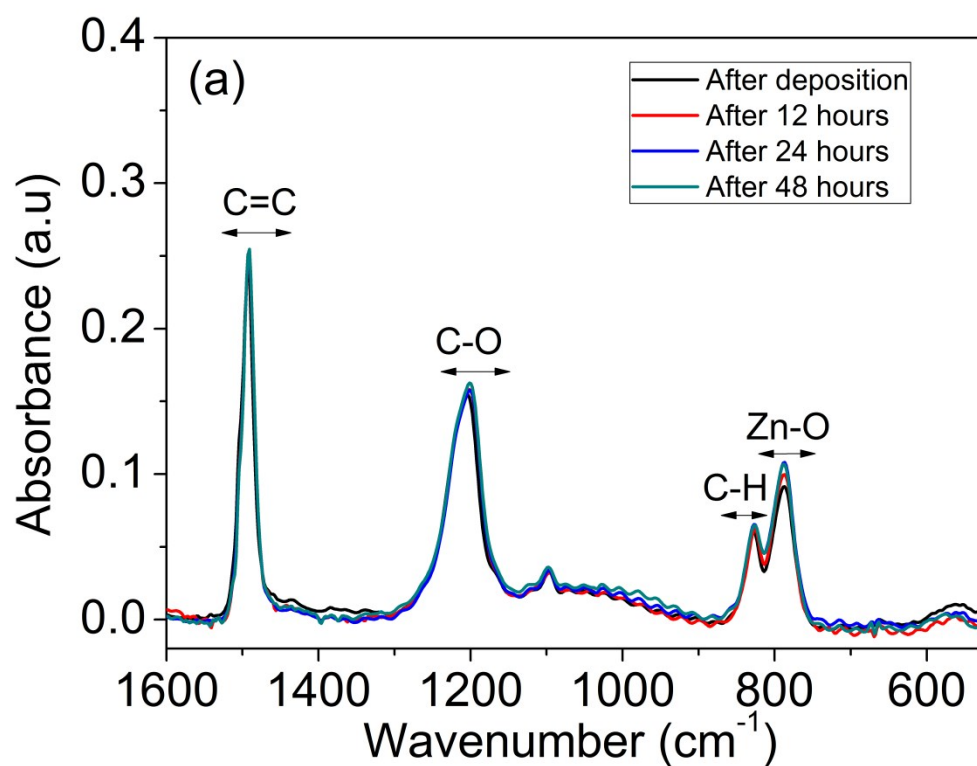

**Figure SI-2.** FTIR spectra of 300 cycles of Zincone film grown on KBr pallets and recorded over a time span of 48 hours. The sample under observation was in vacuum between each scan.

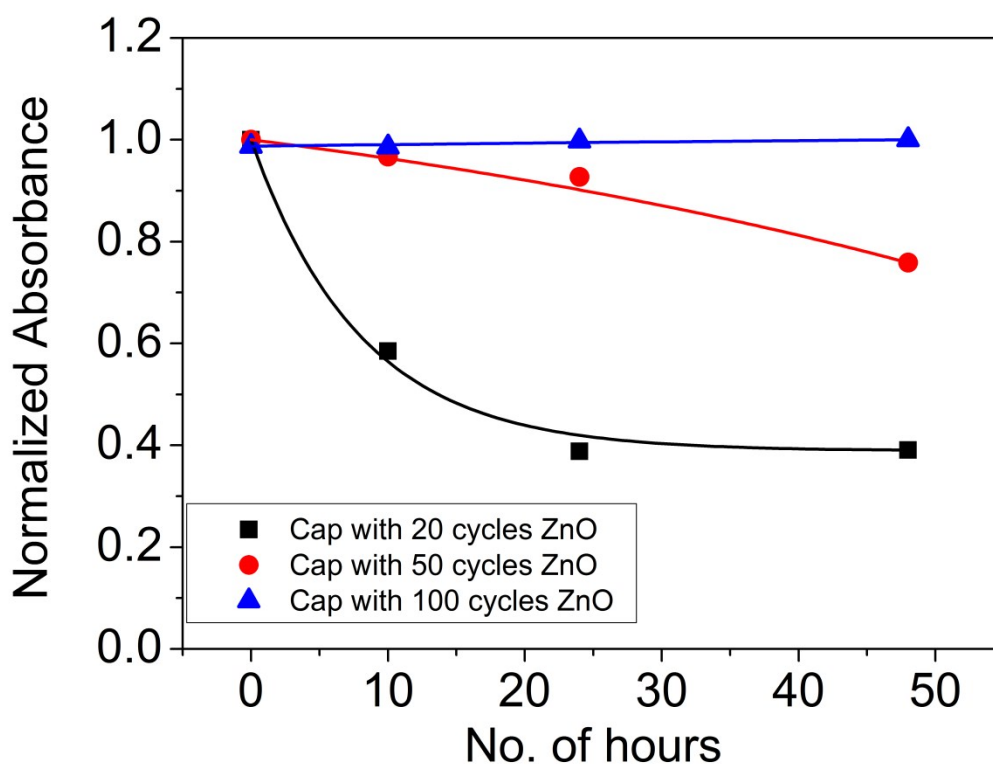

**Figure SI-3.** Variation in the absorbance intensity of Zn-O stretch (at  $788\text{cm}^{-1}$ ) with time with different ZnO capping thickness on it. With 100 cycles i.e ca. 20nm of ZnO capping prevents degradation of the Zn-O stretch and hence zincone material completely under ambient atmospheric conditions.

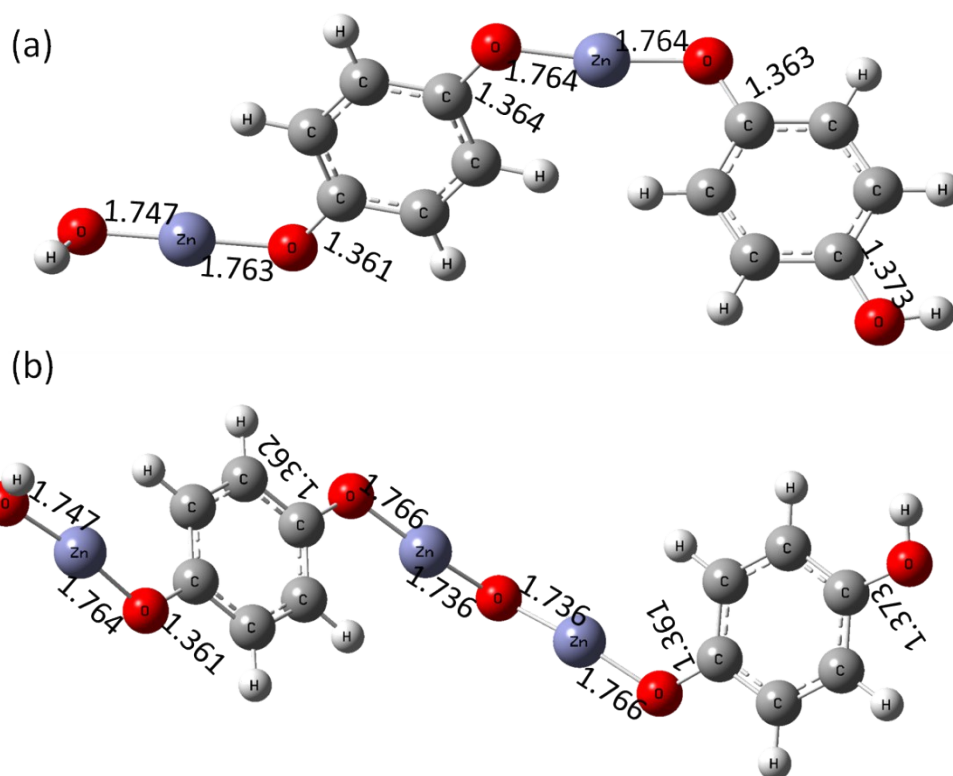

**Figure SI-4.** Bond lengths of (a) Two zincone molecules (b) Two zincone molecules with one ZnO moiety inserted in between as obtained from theoretical DFT calculations.

| <b>Description</b> | <b>Frequency of HQ<br/>(cm<sup>-1</sup>)<br/>(reported)</b> | <b>Frequency of HQ<br/>(cm<sup>-1</sup>)<br/>(Experimental)</b> | <b>Frequency of<br/>zincone after<br/>degradation (cm<sup>-1</sup>)</b> |
|--------------------|-------------------------------------------------------------|-----------------------------------------------------------------|-------------------------------------------------------------------------|
| <b>v(CC)</b>       | 1521                                                        | 1518                                                            | 1514                                                                    |
| <b>v(CC)</b>       | 1455                                                        | 1471                                                            | 1473                                                                    |
| <b>γ(CC)</b>       | 1332                                                        | 1352                                                            | 1367                                                                    |
| <b>v(CO)</b>       | 1249                                                        | 1241                                                            | 1241                                                                    |
| <b>α(CH)</b>       | 1178                                                        | 1206                                                            | 1216                                                                    |
| <b>α(CH)</b>       | 1087                                                        | 1095                                                            | 1098                                                                    |
| <b>γ(CH)</b>       | 821                                                         | 828                                                             | 827                                                                     |
| <b>β(CC)</b>       | 754                                                         | 759                                                             | 757                                                                     |
| <b>δ(CO)</b>       | around 400                                                  | 516                                                             | 520                                                                     |

**Table SI-1** Comparison of the different peak positions of various bond vibration stretches of zincone film after exposed to ambient for five days and only hydroquinone.

| Reaction                                              |                                                  | Step | $\Delta E$<br>(KJ/mol) |
|-------------------------------------------------------|--------------------------------------------------|------|------------------------|
| Reactant                                              | Product                                          |      |                        |
| $H_2O + Zn(C_2H_5)_2$                                 | $[(HO)ZnC_2H_5] + C_2H_6$                        | I    | -120.2                 |
| $[(HO)ZnC_2H_5] + [(HO)Phenyl(OH)]$                   | $[(HO)Zn(OPhenylOH)] + C_2H_6$                   | II   | -84.7                  |
| $[(HO)Zn(OPhenylOH)] + Zn(C_2H_5)_2$                  | $[((HO)Zn(OPhenyl))OZnC_2H_5] + C_2H_6$          | III  | -127.1                 |
| $[(HO)Zn(OPhenyl)OZnC_2H_5] + [(HO)Phenyl(OH)]$       | $[(HO)(ZnOPhenylO)_2H] + C_2H_6$                 | IV   | -78.3                  |
| $[((HO)ZnOPhenyl)OZnC_2H_5] + H_2O$                   | $[((HO)ZnOPhenyl)OZn(OH)] + C_2H_6$              | V    | -77.7                  |
| $[((HO)ZnOPhenyl)OZn(OH)] + Zn(C_2H_5)_2$             | $[((HO)ZnOPhenylO)ZnOZnC_2H_5] + C_2H_6$         | VI   | -132.8                 |
| $[((HO)ZnOPhenylO)ZnOZnC_2H_5] + [(HO)Phenyl(OH)]$    | $[((HO)ZnOPhenylO)_2ZnOH] + C_2H_6$              | VII  | -86.6                  |
| $[((HO)ZnOPhenylO)ZnOZnC_2H_5] + H_2O$                | $[((HO)ZnOPhenylO)ZnOZnOH] + C_2H_6$             | VIII | -82.8                  |
| $[((HO)ZnOPhenylO)ZnOZnOH] + Zn(C_2H_5)_2$            | $[((HO)ZnOPhenylO)ZnOZnOZnC_2H_5] + C_2H_6$      | IX   | -129.4                 |
| $[((HO)ZnOPhenylO)ZnOZnOZnC_2H_5] + [(HO)Phenyl(OH)]$ | $[((HO)ZnOPhenylO)ZnOZnOZnOPhenyl(OH)] + C_2H_6$ | X    | -78.6                  |

**Table SI-2** Various reaction energies for different half surface reactions of zincone and zincone alloys.
